# Supplementary material for: Blood-based proteomic signatures of spontaneous menopause: Implications for later-life brain aging and Alzheimer’s disease risk
Source: Research Square preprint supplement (doi:10.21203/rs.3.rs-8752767/v1), 2026-02-12
Supplement: Supplementary file 2 [file 59562e77cb91a631ebbe1d5e.xlsx]

## Sheet: S14. meno comps restricted age
Table S14. Results of sensitivity analyses showing pairwise contrasts in protein levels by menopause stage, from an age-adjusted ANCOVA (UCSB HAS) restricted to women aged 47-53.
outcome	diff_post-pre	p-value_post-pre	diff_peri-pre	p-value_peri-pre	diff_post-peri	p-value_post-peri
AB38	-0.0282771	0.92467	-0.322419	0.208347	0.294142	0.18882
AB40	0.0163331	0.93733	-0.0939048	0.595414	0.110238	0.475608
AB42	0.144383	0.331343	0.0272962	0.828202	0.117087	0.288823
ACHE	0.267195	0.0628923	0.114066	0.344024	0.15313	0.148007
AGRN	-0.0186997	0.868422	-0.00353605	0.970601	-0.0151636	0.856334
ANXA5	0.429555	0.103324	0.199003	0.370213	0.230552	0.235707
APOE	-0.108188	0.577842	0.0541298	0.743002	-0.162318	0.262725
ARSA	0.294013	0.432913	0.308887	0.333257	-0.0148741	0.957227
BACE1	0.391114	0.00291351	0.277092	0.0119524	0.114023	0.224476
BASP1	-0.0793461	0.914219	0.285643	0.648607	-0.364989	0.505196
BDNF	0.229813	0.0156757	0.13	0.102227	0.0998121	0.149349
CALB2	-0.0208219	0.908831	-0.0125133	0.935478	-0.00830859	0.950893
CCL11	0.434202	0.0151388	0.210823	0.157	0.223379	0.0872661
CCL13	0.85182	0.000783714	0.456952	0.0284134	0.394868	0.0299503
CCL17	1.14807	0.0533424	0.469735	0.345452	0.678331	0.121373
CCL2	0.56147	0.00389224	0.0424153	0.789014	0.519055	0.000429641
CCL22	0.288551	0.165852	0.314376	0.0775516	-0.0258245	0.866001
CCL26	0.674293	0.00582798	0.362873	0.0741858	0.311421	0.0790021
CCL3	0.321069	0.401875	-0.0725532	0.823098	0.393622	0.1686
CCL4	-0.169478	0.540344	-0.124149	0.597596	-0.0453293	0.825035
CD40LG	-0.143632	0.659957	-0.238204	0.39201	0.0945721	0.696162
CD63	0.360837	0.0175597	0.167922	0.184841	0.192915	0.0828667
CHI3L1	0.2458	0.484556	-0.125226	0.674809	0.371027	0.158185
CHIT1	0.186862	0.628641	0.292102	0.375167	-0.10524	0.713411
CNTN2	0.695531	0.186373	-0.0377501	0.932176	0.733281	0.0627193
CRH	0.733073	0.212642	0.654021	0.19123	0.0790515	0.855167
CRP	-0.711613	0.346632	-0.662996	0.302767	-0.0486169	0.930639
CSF2	0.236014	0.307536	-0.055534	0.776559	0.291548	0.0922933
CST3	0.103446	0.421952	-0.00854268	0.937622	0.111989	0.243051
CX3CL1	0.049766	0.712802	-0.0447873	0.6968	0.0945533	0.34773
CXCL1	0.470206	0.108036	0.420065	0.0916837	0.0501415	0.815031
CXCL10	-0.139138	0.621272	-0.0981215	0.681811	-0.0410161	0.844231
CXCL8	0.234195	0.329735	-0.045022	0.824776	0.279217	0.120073
DDC	0.233757	0.378917	0.00559101	0.980173	0.228166	0.24841
ENO2	0.0777392	0.678542	-0.0343726	0.829225	0.112112	0.421622
FABP3	0.0254162	0.893354	-0.043727	0.786214	0.0691432	0.623451
FCN2	0.349153	0.169029	-0.115378	0.589918	0.46453	0.0156567
FGF2	-0.313111	0.348586	-0.0543031	0.847713	-0.258808	0.296916
FLT1	0.380329	0.0444475	0.0526392	0.738526	0.32769	0.0204534
FOLR1	-0.0710225	0.658192	0.0736673	0.589521	-0.14469	0.227443
GDF15	-0.0997659	0.896607	0.407893	0.532764	-0.507658	0.374699
GDI1	0.0347341	0.726824	-0.00146297	0.986182	0.0361971	0.623875
GDNF	-0.111549	0.87105	0.399855	0.494647	-0.511403	0.31825
GFAP	0.225142	0.313052	0.143524	0.448331	0.0816175	0.620731
GOT1	0.297269	0.0657834	0.234401	0.0871621	0.0628685	0.59422
HBA1	0.77794	0.306768	0.7681	0.236076	0.00983959	0.986027
HTT	-0.0840347	0.825788	0.241016	0.458873	-0.325051	0.254207
ICAM1	0.131322	0.492726	0.180528	0.269128	-0.0492064	0.728572
IFNG	0.315179	0.466387	-0.369552	0.31625	0.684731	0.0364954
IGF1R	0.142495	0.0322949	0.0272783	0.622146	0.115217	0.0201742
IGFBP7	0.305083	0.00257286	0.109383	0.186748	0.1957	0.00840703
IL10	-0.241359	0.38438	-0.300918	0.204016	0.0595597	0.771606
IL12p70	0.509115	0.0849166	0.00914805	0.970512	0.499967	0.0240943
IL13	0.336526	0.674523	0.142369	0.834352	0.194157	0.743933
IL15	-0.172259	0.122198	-0.189592	0.0471131	0.0173321	0.832037
IL16	0.236423	0.171646	0.186868	0.203191	0.0495552	0.6969
IL17A	0.0980203	0.776406	-0.421641	0.154738	0.519661	0.0466269
IL18	0.0321772	0.90032	0.133424	0.541956	-0.101246	0.595794
IL1B	0.0564677	0.600476	-0.0296036	0.746509	0.0860712	0.284117
IL2	-0.0112354	0.967934	-0.0699424	0.768572	0.0587069	0.777196
IL33	0.120336	0.573805	-0.0253721	0.888891	0.145708	0.35996
IL4	0.261694	0.581631	-0.188458	0.640527	0.450152	0.204456
IL5	0.0620266	0.922385	-0.450373	0.406925	0.512399	0.280843
IL6	0.119574	0.777864	-0.0875549	0.808001	0.207129	0.510915
IL6R	0.281151	0.0890074	0.243799	0.0829675	0.0373513	0.757442
IL7	0.184478	0.40503	0.162247	0.38911	0.0222309	0.892062
IL9	0.0829713	0.79971	0.167317	0.547873	-0.0843453	0.728209
KDR	0.324944	0.507051	-0.390034	0.349954	0.714978	0.0530346
KLK6	-0.0268764	0.84418	-0.180194	0.125498	0.153318	0.13507
MAPT	0.019719	0.937793	-0.191228	0.375193	0.210947	0.263502
MDH1	0.416258	0.183991	0.189856	0.473175	0.226402	0.328141
MME	0.941092	0.264525	0.239599	0.736819	0.701493	0.262365
MSLN	-0.0513628	0.870866	0.132774	0.621474	-0.184137	0.433572
NEFH	-1.2134	0.242799	-0.830527	0.345844	-0.382873	0.617418
NEFL	-0.0902381	0.59103	-0.175512	0.221736	0.0852736	0.494146
NGF	0.193514	0.184412	0.00769779	0.950036	0.185816	0.0877081
NPTX1	0.141267	0.567551	0.238734	0.258077	-0.0974669	0.594947
NPTX2	-0.077829	0.647777	-0.042951	0.766656	-0.034878	0.782467
NPTXR	-0.1468	0.403092	-0.234925	0.118722	0.0881251	0.498233
NPY	0.131001	0.831118	0.0256381	0.960833	0.105363	0.817188
NRGN	-0.185108	0.490038	0.0643649	0.777261	-0.249473	0.212433
OligoSNCA	-0.0829616	0.730973	0.0261211	0.898616	-0.109083	0.542846
PARK7	0.020318	0.947512	0.0673778	0.797396	-0.0470599	0.837215
PDGFRB	0.277008	0.335453	0.161805	0.507049	0.115202	0.5881
PDLIM5	2.11891	0.0378387	1.67202	0.0532119	0.446896	0.547023
PGF	-0.0277108	0.81815	-0.0034706	0.972971	-0.0242402	0.786364
PGK1	0.120734	0.80184	0.223282	0.585539	-0.102548	0.773918
POSTN	0.0715362	0.755278	-0.218171	0.266239	0.289708	0.0933626
PRDX6	-0.259301	0.491694	0.000512116	0.998722	-0.259813	0.354065
PSEN1	0.332562	0.0547686	0.0330768	0.818947	0.299485	0.0208074
pSNCA129	-0.292417	0.434954	0.18831	0.553718	-0.480727	0.0873306
pTau181	0.0714052	0.711586	-0.0937692	0.568283	0.165174	0.251875
pTau217	0.0251859	0.85399	-0.145629	0.214167	0.170815	0.0970934
pTau231	0.386427	0.101336	0.0583117	0.768241	0.328115	0.0618652
pTDP43409	0.272661	0.0623611	0.062176	0.611354	0.210485	0.0528346
PTN	-0.0123643	0.973012	0.14745	0.635472	-0.159815	0.556332
REST	-0.271305	0.231674	-0.1523	0.427775	-0.119005	0.477467
RUVBL2	-0.0251547	0.906702	0.033116	0.855993	-0.0582707	0.71461
S100A12	0.949185	0.0323942	0.358188	0.333305	0.590997	0.0706991
S100B	0.459977	0.0562917	0.0846592	0.67406	0.375318	0.03651
SAA1	0.148019	0.831216	0.106783	0.856458	0.0412359	0.936205
SFRP1	0.38236	0.523399	0.246983	0.62748	0.135377	0.760389
SFTPD	0.32321	0.319083	0.527949	0.0588228	-0.20474	0.394353
SLIT2	0.204675	0.16189	0.195603	0.116786	0.0090717	0.932754
SMOC1	0.799589	0.121287	0.176889	0.683432	0.6227	0.104326
SNAP25	0.120399	0.00273428	0.0411566	0.210775	0.0792426	0.00731247
SNCA	-0.233303	0.501855	0.0930766	0.752214	-0.32638	0.208054
SNCB	0.148188	0.169779	0.0605247	0.506408	0.0876634	0.272052
SOD1	0.198152	0.616409	0.201062	0.550108	-0.00290965	0.99208
SQSTM1	-0.0293102	0.923607	0.114859	0.658773	-0.144169	0.525815
TAFA5	0.0832407	0.665446	0.158231	0.335418	-0.0749903	0.599746
TARDBP	-0.0221134	0.950378	0.155025	0.608285	-0.177138	0.502643
TEK	0.309777	0.0170582	0.198889	0.0682249	0.110887	0.239448
TIMP3	0.431597	0.310599	0.672052	0.0664618	-0.240455	0.44543
TNF	0.0889668	0.507676	-0.0514501	0.651857	0.140417	0.162008
TREM1	0.0438969	0.807548	-0.0383262	0.802455	0.0822231	0.539257
TREM2	0.161027	0.503228	0.359974	0.0822965	-0.198946	0.266902
UBB	-0.246119	0.710728	-0.0356754	0.949543	-0.210444	0.669169
UCHL1	0.0617014	0.0872445	0.0546974	0.0749085	0.00700401	0.790675
VCAM1	0.0227998	0.861659	0.09981	0.371381	-0.0770102	0.429007
VEGFA	0.395053	0.170642	0.31519	0.197982	0.0798632	0.706479
VEGFD	0.118368	0.525345	0.238112	0.136447	-0.119744	0.387356
VGF	-0.460358	0.656068	0.0798744	0.927508	-0.540232	0.481876
VSNL1	-0.114552	0.637666	-0.405621	0.0539541	0.291069	0.110945
YWHAG	0.184169	0.163823	0.135299	0.227756	0.0488701	0.615529
YWHAZ	0.000317794	0.99928	0.40786	0.177112	-0.407542	0.123355

## Sheet: S15. meno sx aging no ooph
Table S15. Results of sensitivity analyses testing associations of menopause symptom history in aging women (WRAP) with PC1 (main) and individual proteins (post hoc), excluding women who reported history of bilateral oophorectomy. Models are adjusted for age and hormone therapy use.
protein	estimate_hotflashes	p.value_hotflashes	estimate_probsleep	p.value_probsleep	estimate_symptcount	p.value_symptcount	estimate_nightsweats	p.value_nightsweats	estimate_sexdys	p.value_sexdys	estimate_moodsw	p.value_moodsw	estimate_depress	p.value_depress
PC1	1.44748	0.0316	1.07392	0.0468	0.38428	0.038	0.19124	0.7187	0.8617	0.3043	1.03848	0.0589	0.31211	0.6491
CNTN2	0.257754	0.265322	0.142874	0.441445	0.0679823	0.285253	N/A	N/A	N/A	N/A	N/A	N/A	N/A	N/A
CCL13	0.309048	0.0543057	0.122172	0.34611	0.0658769	0.137364	N/A	N/A	N/A	N/A	N/A	N/A	N/A	N/A
IL12p70	0.429464	0.0261664	0.165669	0.289536	0.158059	0.00256718	N/A	N/A	N/A	N/A	N/A	N/A	N/A	N/A
CXCL1	0.115178	0.793062	0.121966	0.72854	-0.0181061	0.880746	N/A	N/A	N/A	N/A	N/A	N/A	N/A	N/A
CCL26	-0.0901315	0.621557	0.0627526	0.667739	-0.0323037	0.519537	N/A	N/A	N/A	N/A	N/A	N/A	N/A	N/A
CCL2	0.420864	0.00471398	0.0185809	0.879094	0.0563449	0.176698	N/A	N/A	N/A	N/A	N/A	N/A	N/A	N/A
CCL11	0.160368	0.160044	0.128488	0.159685	0.0297123	0.345206	N/A	N/A	N/A	N/A	N/A	N/A	N/A	N/A
BACE1	0.137979	0.055825	0.146867	0.0103032	0.0598665	0.00212424	N/A	N/A	N/A	N/A	N/A	N/A	N/A	N/A
pTau_231	0.258003	0.18578	0.162396	0.299163	0.0604661	0.259913	N/A	N/A	N/A	N/A	N/A	N/A	N/A	N/A
ACHE	0.00920077	0.938226	0.0597229	0.529246	-0.00584749	0.857764	N/A	N/A	N/A	N/A	N/A	N/A	N/A	N/A
CD63	0.124066	0.393427	0.0709163	0.542724	0.0222119	0.578763	N/A	N/A	N/A	N/A	N/A	N/A	N/A	N/A
IGFBP7	0.0980683	0.191039	0.0530717	0.378115	0.0291078	0.157587	N/A	N/A	N/A	N/A	N/A	N/A	N/A	N/A
TEK	0.120964	0.17692	0.0864137	0.228745	0.0412674	0.0927241	N/A	N/A	N/A	N/A	N/A	N/A	N/A	N/A
IGF1R	0.0919394	0.117723	0.0988856	0.0344408	0.036335	0.0233276	N/A	N/A	N/A	N/A	N/A	N/A	N/A	N/A
SNAP25	-0.000840975	0.984687	0.0465415	0.182167	0.00442884	0.712943	N/A	N/A	N/A	N/A	N/A	N/A	N/A	N/A

## Sheet: S16. aging memory no ooph
Table S16. Results of sensitivity analyses testing associations of PC1 and menopause proteins with memory outcomes in aging women (WRAP and BrANCH), excluding women who reported bilateral oophorectomy. Models are adjusted for age and education.
protein	estimate_WRAP	p.value_WRAP	estimate_Branch	p.value_Branch
PC1	-0.14024	0.0095	-0.00516	0.67293
CNTN2	0.0605587	0.727622	0.0363281	0.604956
CCL13	0.0188619	0.935643	-0.0537459	0.423531
IL12p70	0.0311507	0.869077	-0.0164149	0.817649
CXCL1	-0.207319	0.0153077	0.0503655	0.468391
CCL26	0.138437	0.502847	-0.0182818	0.780479
CCL2	-0.518108	0.0330368	-0.00847212	0.905929
CCL11	-0.610737	0.0476425	-0.170159	0.0145363
BACE1	-0.117387	0.81942	-0.0493995	0.459149
pTau.231	-0.607852	0.000979091	-0.0344498	0.616877
ACHE	-0.699105	0.0269438	0.00992348	0.888376
CD63	-0.381839	0.152189	0.0746968	0.277376
IGFBP7	-0.410458	0.391613	-0.0201239	0.776028
TEK	-0.0547198	0.896499	-0.0310355	0.685282
BDNF	N/A	N/A	0.00360539	0.958876
IGF1R	-0.623715	0.316088	0.024626	0.73134
SNAP25	-2.32593	0.00492483	0.0209651	0.758686

## Sheet: S17.aging exec function no ooph
Table S17. Results of sensitivity analyses testing associations of PC1 and menopause proteins with executive function outcomes in aging women (WRAP and BrANCH), excluding women who reported bilateral oophorectomy. Models are adjusted for age and education.
protein	estimate_WRAP	p.value_WRAP	estimate_Branch	p.value_Branch
PC1	0.02701	0.600933	-0.023865	0.01449
CNTN2	0.384168	0.0150541	0.0129912	0.820871
CCL13	0.00688576	0.97446	-0.0675717	0.228585
IL12p70	0.0177162	0.917639	0.0334067	0.566354
CXCL1	-0.0677392	0.416607	0.0433776	0.454326
CCL26	0.420248	0.0223102	-0.0640385	0.217179
CCL2	-0.314909	0.171635	-0.0651715	0.283687
CCL11	0.143854	0.611385	-0.173708	0.00327887
BACE1	0.0875214	0.851393	-0.0100772	0.855532
pTau.231	-0.407614	0.0190164	0.00964239	0.864785
ACHE	0.275559	0.400455	0.0131291	0.819117
CD63	0.465345	0.0597715	-0.0535789	0.338406
IGFBP7	0.181296	0.675999	-0.0277471	0.632453
TEK	0.469702	0.215582	-0.0186949	0.767524
BDNF	N/A	N/A	-0.1179	0.0355315
IGF1R	0.0481031	0.933096	-0.0450236	0.43865
SNAP25	0.100775	0.895566	-0.0730207	0.203556

## Sheet: S18. aging ptau no ooph
Table S18. Results of sensitivity analyses testing associations of PC1 and menopause proteins with ptau/AB42 outcomes in aging women (WRAP and BrANCH), excluding women who reported bilateral oophorectomy. Models are adjusted for age and BMI.
protein	estimate_WRAP	p.value_WRAP	estimate_Branch	p.value_Branch
PC1	0.08952	0.0358	0.099	0.291
CNTN2	-0.0168533	0.899941	0.00570245	0.95938
CCL13	0.206136	0.240893	0.409142	0.0609569
IL12p70	-0.0170932	0.906762	0.324996	0.261719
CXCL1	0.124228	0.0585501	-0.070771	0.648466
CCL26	-0.341188	0.0391891	0.425883	0.29211
CCL2	0.317598	0.109411	0.412658	0.364825
CCL11	-0.0879318	0.73032	0.700639	0.0163186
BACE1	1.08761	0.00724189	-0.615707	0.35828
pTau.231	0.882271	6.35e-13	1.06653	7.70192e-05
ACHE	0.423619	0.0973975	-0.493954	0.306888
CD63	-0.100445	0.642182	-0.799565	0.103941
IGFBP7	-0.606541	0.10038	0.291259	0.704754
TEK	-0.0030747	0.992665	0.0798223	0.886237
BDNF	N/A	N/A	-0.0328691	0.815141
IGF1R	0.640213	0.189114	-0.590743	0.600327
SNAP25	2.09847	0.00110441	0.163257	0.795439

## Sheet: S19. PC1 no ptau231
Table S19. Results of sensitivity analyses testing associations of an alternate PC1 (recomputed excluding ptau231) with cognitive and ptau/AB42 outcomes in aging women (WRAP and BrANCH). Models are adjusted for age, education (for memory/EF), and BMI (for ptau/AB42).
outcome	PC1 estimate WRAP	PC1 95% CI Lower, WRAP	PC1 95% CI Upper, WRAP	PC1 p.value WRAP	PC1 estimate BrANCH	PC1 95% CI Lower, BrANCH	PC1 95% CI Upper, BrANCH	PC1 p.value BrANCH
Memory	-0.13923	-0.249744	-0.0287108	0.0141	-0.0048	-0.023	0.0135	0.6104
Executive function	0.03759	-0.0663295	0.141509	0.474042	-0.0126	-0.0255	0.0004	0.0611
Plasma ptau/AB42	0.0631	-0.0239248	0.150115	0.1531	0.106182	-0.020834	0.233198	0.0996
