# Supplementary material for: Blood-based proteomic signatures of spontaneous menopause: Implications for later-life brain aging and Alzheimer’s disease risk
Source: Research Square preprint supplement (doi:10.21203/rs.3.rs-8752767/v1), 2026-02-12
Supplement: Supplementary file 3 [file 7717db37031fadebe97926ae.xlsx]

## Sheet: S1. UCSB HAS demos
Table S1. UCSB HAS spontaneous menopause cohort characteristics.
	Menopause stage			Sex
	Premenopausal (N=30)	Perimenopausal (N=26)	Postmenopausal (N=24)	Female (N=80)	Male (N=36)
Age, mean (SD) years	47.3 (2.23)***	51.0 (2.31)***	53.1 (2.02)***	50.2 (3.27)	50.8 (4.15)
Ethnicity, N (%)
Black/African American	0 (0.0)	0 (0.0)	1 (4.2)	1 (1.3)	1 (2.8)
Filipino	0 (0.0)	0 (0.0)	1 (4.2)	1 (1.3)	0 (0.0)
Japanese	0 (0.0)	0 (0.0)	1 (4.2)	1 (1.3)	0 (0.0)
Mexican	1 (3.3)	0 (0.0)	1 (4.2)	2 (2.6)	1 (2.8)
Mixed	1 (3.3)	0 (0.0)	1 (4.2)	2 (2.6)	0 (0.0)
Native American/Alaskan	1 (3.3)	0 (0.0)	0 (0.0)	1 (1.3)	2 (5.6)
White	26 (86.7)	24 (100.0)	19 (79.2)	69 (88.5)	32 (88.9)
White/Chinese/Vietnamese	1 (3.3)	0 (0.0)	0 (0.0)	1 (1.3)	0 (0.0)
Education, mean (SD) years	16.8 (1.71)	16.8 (1.95)	17.1 (2.04)	16.9 (1.87)***	18.1 (1.65)***
BMI, mean (SD)	25.5 (4.28)	25.2 (3.33)	25.7 (5.98)	25.5 (4.58)	26.3 (3.35)
STRAW stage, N (%)				-
-3b	9 (30.0)	-	-	-	-
-3a	21 (70.0)	-	-	-	-
-2	-	10 (40.0)	-	-	-
-1	-	15 (60.0)	-	-	-
1a	-	-	6 (25.0)	-	-
1b	-	-	6 (25.0)	-	-
1c	-	-	11 (45.8)	-	-
2	-	-	1 (4.2)		-
Estradiol (pg/mL), mean (SD)	97.7 (95.24)**	62.9 (59.32)**	9.34 (11.32)**	61.3 (77.2)	-
Progesterone (ng/mL), mean (SD)	2.50 (2.94)*	1.65 (3.25)*	0.60 (0.55)*	1.69 (2.70)	-
FSH (mlU/mL), mean (SD)	9.18 (7.22)***	36.8 (25.5) ***	82.2 (34.3)***	38.9 (38.0)	-
SHBG (nmol/L), mean (SD)	65.5 (39.2)	82.9 (47.8)	60.7 (31.6)	69.6 (40.7)***	37.0 (18.6)***
DHEAS (ug/dL), mean (SD)	130.1 (73.4)	122.5 (64.4)	116.8 (52.3)	123.8 (64.5)***	191.6 (73.2)***
Testosterone (ng/dL), mean (SD)	16.7 (10.1)	19.1 (11.2)	14.9 (13.1)	16.9 (11.3)***	479.9 (141.4)***
Menopause symptoms in last two weeks
Hot flashes, N (%)	-	11 (44.0)	16 (66.7)	-	-
Night sweats, N (%)	-	16 (64.0)	11 (45.8)	-	-
Vaginal dryness, N (%)	-	6 (24.0)	8 (33.3)	-	-
Irritability, N (%)	-	19 (76.0)	15 (62.5)	-	-
Unilateral oophorectomy, N (%)	0 (0.0)	0 (0.0)	1 (4.17)	1 (1.25)	-
Current hormonal contraceptive use, N (%)	1 (3.4)	0 (0.0)	0 (0.0)	1 (1.3)	-
Past hormone therapy use, N (%)	0 (0.0)	2 (8.0)	0 (0.0)	2 (2.6)	-
* p < .05, ** p < .01, *** p < .001

## Sheet: S2. WRAP BrANCH demos
Table S2. Characteristics of participants in the Wisconsin Registry for Alzheimer’s Prevention (WRAP) and the UCSF Brain Aging Network for Cognitive Health (BrANCH) cohorts.
	Aging cohort 1 (WRAP; N = 94)	Aging cohort 2 (BrANCH; N = 100)
Age, mean (SD) years	69.5 (6.86)	72.1 (7.67)
Race, N (%)
Black/African American	5 (5.3)	2 (2.0)
Chinese	0 (0.0)	5 (5.1)
Japanese	0 (0.0)	2 (2.0)
White	87 (92.6)	88 (88.9)
Other race	0 (0.0)	2 (2.0)
Education, mean (SD) years	16.6 (3.00)	17.1 (2.10)
BMI, mean (SD)	27.7 (5.72)	24.4 (4.40)
APOE4 carrier, N (%)	45 (48.4)	25 (26.3)
Clinical diagnosis, N (%)
Clinically normal	79 (84.0)	99 (99.0)
MCI	9 (9.6)	1 (1.0)
Dementia	5 (5.3)	0 (0.0)
Missing	1 (1.1)	0 (0.0)
Amyloid status, N (%)
Positive	60 (63.8)	13 (13.0)
Negative	31 (33.0)	47 (47.0)
No plasma biomarker	3 (3.19)	40 (40.0)
Bilateral oophorectomy, N (%)	3 (3.2)	19 (31.1)
History of hormone therapy, N (%)	27 (28.7)	52 (60.5)
Menopause symptom history, N (%)
Hot flashes	73 (82.0)	-
Night sweats	47 (52.8)	-
Sexual dysfunction	11 (12.4)	-
Problems sleeping	45 (50.6)	-
Mood swings	31 (34.8)	-
Depression	17 (19.1)	-
No symptoms ever	4 (4.5)	-
Menopause symptom count, median (IQR)	3 (2, 4)	-
Follow-up time, mean (SD) years	-	5.74 (2.45)
Number of visits, median (IQR)	-	4 (3, 6)

## Sheet: S3. UKB demos
Table S3. Participant characteristics in UKB age-matched sample.
	Premenopausal (N=1,407)	Postmenopausal (N=1,407)	P-value
Age, mean (SD) years	50.87 (2.51)	50.91 (2.62)	0.681
Education, mean (SD) years	13.85 (2.23)	13.50 (2.22)	<0.001
BMI, mean (SD)	26.77 (5.50)	26.83 (5.37)	0.75
Past hormone therapy use, N (%)	64 (4.5)	271 (19.3)	<0.001
Current oral contaceptive use, N (%)	53 (4.3)	8 (0.7)	<0.001

## Sheet: S4. meno stage UCSB
Table S4. Results of pairwise contrasts testing differences in protein levels by menopause stage, from an age-adjusted ANCOVA (UCSB HAS)
protein	diff_post-pre	p-value_post-pre	diff_peri-pre	p-value_peri-pre	diff_post-peri	p-value_post-peri
AB38	0.117855	0.6566	-0.230784	0.282921	0.34864	0.0803092
AB40	0.129553	0.456582	-0.0437337	0.755488	0.173287	0.183067
AB42	0.167823	0.202262	0.0674904	0.524111	0.100332	0.30522
ACHE	0.333755	0.0067684	0.231321	0.0194503	0.102434	0.254943
AGRN	-0.0608843	0.521373	-0.0263574	0.731011	-0.0345269	0.625253
ANXA5	0.258877	0.312294	0.0848824	0.681031	0.173995	0.361658
APOE	0.00808718	0.964307	0.013788	0.924798	-0.00570085	0.966223
ARSA	0.186942	0.563729	0.288045	0.272471	-0.101103	0.674965
BACE1	0.429858	0.000129202	0.284411	0.00146187	0.145448	0.0707934
BASP1	0.322583	0.632107	0.250363	0.645693	0.0722207	0.885512
BDNF	0.233427	0.00640054	0.14574	0.0334378	0.0876867	0.16143
CALB2	-0.0262559	0.884025	0.0394769	0.786158	-0.0657327	0.624225
CCL11	0.461468	0.00400307	0.232093	0.0686287	0.229375	0.0512558
CCL13	0.746428	0.000527796	0.404472	0.0175792	0.341956	0.0289388
CCL17	0.909557	0.0644175	0.230067	0.558763	0.67949	0.06368
CCL2	0.488827	0.00175034	0.0549559	0.65307	0.433871	0.000231774
CCL22	0.256926	0.126841	0.22101	0.104554	0.0359163	0.772861
CCL26	0.528999	0.0172047	0.218587	0.216874	0.310412	0.0587866
CCL3	0.328138	0.273576	0.0653756	0.786477	0.262762	0.239517
CCL4	-0.124991	0.630971	0.102676	0.625406	-0.227667	0.241952
CD40LG	-0.172301	0.539203	-0.328182	0.150188	0.155881	0.456113
CD63	0.286445	0.0443969	0.170643	0.136036	0.115802	0.270766
CHI3L1	0.202432	0.491859	-0.0368849	0.876676	0.239316	0.276483
CHIT1	0.257112	0.44408	0.459609	0.0929372	-0.202497	0.418544
CNTN2	0.899696	0.0470065	0.227827	0.528909	0.671869	0.0464804
CRH	0.872791	0.0945571	0.656876	0.119082	0.215915	0.575626
CRP	-0.801745	0.199385	-0.425442	0.398033	-0.376302	0.417245
CSF2	0.0697161	0.714765	0.00512065	0.973494	0.0645954	0.649504
CST3	0.0954803	0.373987	0.00813171	0.925173	0.0873486	0.275562
CX3CL1	0.00428752	0.969439	-0.0979251	0.280826	0.102213	0.222448
CXCL1	0.586403	0.0337832	0.360166	0.104569	0.226237	0.266416
CXCL10	-0.215236	0.361785	-0.137123	0.471788	-0.078114	0.656155
CXCL8	0.247573	0.240152	0.0269542	0.873721	0.220618	0.160803
DDC	0.284942	0.26581	0.0834393	0.68578	0.201503	0.290616
ENO2	0.0874605	0.606864	0.0116321	0.932467	0.0758285	0.549386
FABP3	-0.0464067	0.770632	-0.0761989	0.554009	0.0297921	0.801605
FCN2	0.0855273	0.705867	-0.226785	0.217754	0.312312	0.067186
FGF2	-0.507393	0.133933	-0.274793	0.313278	-0.2326	0.354149
FLT1	0.207129	0.175868	-0.0170686	0.889579	0.224197	0.0507218
FOLR1	-0.0782881	0.572436	-0.0158767	0.887262	-0.0624113	0.54586
GDF15	0.0289437	0.965269	0.555246	0.303081	-0.526303	0.289635
GDI1	0.0381339	0.657995	-0.0205956	0.767298	0.0587295	0.361101
GDNF	-0.0990141	0.872508	0.550466	0.271561	-0.64948	0.160335
GFAP	0.217666	0.245059	0.176246	0.244221	0.0414206	0.76556
GOT1	0.258411	0.0830798	0.20903	0.0828381	0.0493811	0.653623
HBA1	0.971857	0.115966	0.848865	0.0898068	0.122992	0.787791
HTT	-0.201866	0.571285	0.0808148	0.778979	-0.282681	0.288494
ICAM1	0.0200489	0.901452	0.105984	0.418993	-0.0859354	0.476878
IFNG	0.177575	0.61629	-0.253563	0.376829	0.431137	0.105141
IGF1R	0.137825	0.028414	0.0485447	0.333351	0.0892804	0.0557508
IGFBP7	0.279834	0.0015333	0.108825	0.117879	0.171008	0.00862101
IL10	-0.197898	0.420388	-0.267882	0.178863	0.0699841	0.701616
IL12p70	0.624786	0.0151236	0.159619	0.434476	0.465167	0.0151784
IL13	0.314726	0.630027	-0.225326	0.669566	0.540052	0.268763
IL15	-0.096094	0.313849	-0.092319	0.231886	-0.00377503	0.957499
IL16	0.12029	0.462041	0.0464527	0.724921	0.0738378	0.544256
IL17A	0.182854	0.639378	0.00927707	0.976519	0.173577	0.550628
IL18	-0.101524	0.677298	0.0122207	0.950553	-0.113745	0.531687
IL1B	0.101307	0.339287	0.0123196	0.885345	0.0889875	0.260401
IL2	-0.0724833	0.749281	-0.130642	0.476644	0.0581582	0.730691
IL33	0.0445986	0.794066	-0.0721288	0.601695	0.116727	0.360301
IL4	0.430925	0.254874	-0.0946147	0.756159	0.52554	0.0641882
IL5	-0.369778	0.46655	-0.586861	0.154848	0.217083	0.565849
IL6	-0.208854	0.582631	-0.109494	0.721346	-0.0993593	0.725468
IL6R	0.198773	0.194544	0.229307	0.0656119	-0.0305337	0.787982
IL7	0.16782	0.387428	0.104343	0.505712	0.0634774	0.660189
IL9	0.0666975	0.813378	0.174627	0.445241	-0.107929	0.608334
KDR	0.264068	0.582226	-0.218986	0.572472	0.483054	0.178885
KLK6	0.0159644	0.904328	-0.0794993	0.459759	0.0954637	0.336082
MAPT	0.124494	0.553221	-0.0524558	0.757041	0.176949	0.259365
MDH1	0.364541	0.171177	0.221886	0.301473	0.142655	0.470242
MME	-0.187617	0.814569	-0.404087	0.532441	0.21647	0.716482
MSLN	-0.220403	0.42447	-0.0910023	0.682804	-0.129401	0.528711
NEFH	-1.00934	0.256126	-0.917685	0.201964	-0.091655	0.889442
NEFL	-0.156737	0.357426	-0.149808	0.277012	-0.00692934	0.956323
NGF	0.152401	0.245588	0.00809388	0.938913	0.144307	0.141046
NPTX1	0.0698517	0.750582	0.085401	0.630787	-0.0155493	0.924302
NPTX2	-0.0295229	0.838891	0.0433927	0.711678	-0.0729156	0.500852
NPTXR	0.000297703	0.998583	-0.0731227	0.589715	0.0734204	0.556962
NPY	0.280174	0.592024	0.246696	0.559416	0.0334781	0.931434
NRGN	-0.142838	0.624739	0.115719	0.623934	-0.258557	0.236409
OligoSNCA	-0.105481	0.603723	-0.0210262	0.898055	-0.084455	0.576978
PARK7	-0.140318	0.58824	-0.0671215	0.748504	-0.0731968	0.704467
PDGFRB	0.495151	0.0742976	0.457772	0.0418521	0.0373795	0.85498
PDLIM5	1.67526	0.0663472	1.30085	0.0774882	0.374402	0.57789
PGF	-0.0482697	0.670451	-0.0116027	0.899241	-0.036667	0.664354
PGK1	-0.0969475	0.823988	0.0183474	0.95846	-0.115295	0.722598
POSTN	0.188265	0.338593	-0.0456372	0.773502	0.233902	0.112395
PRDX6	-0.19063	0.569551	0.22449	0.407888	-0.41512	0.0990862
PSEN1	0.13704	0.396769	-0.0967203	0.459067	0.23376	0.0546903
pSNCA129	-0.190533	0.61171	0.261187	0.390016	-0.45172	0.108884
pTau181	0.122701	0.445531	0.00725566	0.955405	0.115446	0.335831
pTau217	0.0857698	0.44382	-0.0393157	0.663667	0.125086	0.135955
pTau231	0.398951	0.0362333	0.10691	0.481802	0.292041	0.0394948
pTDP43409	0.225574	0.0544914	0.0483119	0.606289	0.177262	0.0427948
PTN	0.219968	0.474538	0.392013	0.117201	-0.172044	0.452839
REST	-0.206952	0.295951	-0.026255	0.869236	-0.180697	0.221189
RUVBL2	-0.0856389	0.642454	-0.0447969	0.763725	-0.0408421	0.766199
S100A12	0.461751	0.276835	-0.111746	0.743846	0.573497	0.0717503
S100B	0.371936	0.0661816	0.0838827	0.604491	0.288053	0.0563494
SAA1	0.0237711	0.968186	0.0543401	0.910192	-0.030569	0.94511
SFRP1	0.103824	0.836873	0.0359818	0.929643	0.067842	0.856674
SFTPD	0.224336	0.412317	0.28372	0.200997	-0.0593837	0.770375
SLIT2	0.204402	0.102795	0.180206	0.0756303	0.0241957	0.79372
SMOC1	0.740423	0.148862	0.172861	0.674768	0.567562	0.137592
SNAP25	0.106607	0.00448717	0.0488868	0.100682	0.0577206	0.0365112
SNCA	-0.105699	0.747612	0.19667	0.459486	-0.302369	0.218715
SNCB	0.169281	0.0608679	0.0842116	0.245229	0.0850697	0.203198
SOD1	0.0453969	0.894849	0.0580292	0.83444	-0.0126323	0.960622
SQSTM1	-0.19431	0.466459	0.0478035	0.8243	-0.242113	0.224634
TAFA5	0.138452	0.449558	0.159407	0.282355	-0.0209545	0.877684
TARDBP	-0.108415	0.739095	-0.0126188	0.961733	-0.0957965	0.69285
TEK	0.247979	0.0272452	0.169853	0.0601705	0.0781257	0.344019
TIMP3	0.1512	0.695892	0.230186	0.462167	-0.0789866	0.783951
TNF	0.0312641	0.784745	-0.0537059	0.561906	0.0849699	0.32046
TREM1	0.00165127	0.99062	-0.0556034	0.624573	0.0572547	0.584629
TREM2	0.0671153	0.735825	0.27137	0.0943618	-0.204255	0.170591
UBB	-0.162827	0.785815	-0.158429	0.743594	-0.00439842	0.992136
UCHL1	0.0622928	0.0719215	0.0554903	0.0478248	0.0068025	0.789779
VCAM1	0.0654838	0.555264	0.0936303	0.297881	-0.0281465	0.733388
VEGFA	0.13947	0.564726	0.159394	0.416031	-0.0199234	0.911981
VEGFD	0.0886585	0.646947	0.159681	0.308767	-0.0710228	0.622386
VGF	0.119275	0.894931	0.192702	0.791825	-0.0734275	0.91309
VSNL1	-0.135493	0.513727	-0.304477	0.0720515	0.168984	0.275461
YWHAG	0.110864	0.27599	0.112553	0.17217	-0.00168891	0.982156
YWHAZ	-0.153704	0.630103	0.235651	0.361937	-0.389355	0.104253

## Sheet: S5. sex diffs
Table S5. Sex differences in levels of 16 menopause-related proteins, adjusted for age (UCSB HAS).
protein	diff_F-M	p-value_F-M
CNTN2	-0.412158	0.0744618
CCL13	0.129247	0.233576
IL12p70	0.022465	0.859151
CXCL1	0.0191857	0.884148
CCL26	-0.281408	0.0382419
CCL2	0.0404688	0.618055
CCL11	-0.0868857	0.278526
BACE1	-0.0563216	0.314067
pTau231	-0.279899	0.00263561
ACHE	-0.24833	8.65065e-05
CD63	-0.234299	0.00320282
IGFBP7	-0.13282	0.00395005
TEK	-0.0922407	0.109831
BDNF	0.0826656	0.0790756
IGF1R	-0.0937485	0.0033228
SNAP25	0.00203447	0.920223

## Sheet: S6. cors with age 
Table S6. Correlations of levels of 16 menopause-related proteins with age in women and men (UCSB HAS).
	Women		Men
protein	partial cor	p.value	cor	p.value
CNTN2	-0.117981	0.297275	0.041472	0.810211
CCL13	-0.206522	0.0660645	-0.111915	0.515795
IL12p70	-0.0807252	0.476572	-0.0951967	0.580757
CXCL1	-0.214916	0.0555628	-0.147151	0.391765
CCL26	-0.153275	0.174656	-0.044647	0.795977
CCL2	-0.0340493	0.764299	-0.104686	0.543439
CCL11	0.0646339	0.568949	0.110728	0.520288
BACE1	-0.169724	0.132295	-0.0454463	0.792404
pTau231	-0.131172	0.246135	0.246617	0.147063
ACHE	-0.014698	0.89704	-0.127981	0.456965
CD63	-0.188647	0.0937696	-0.0471714	0.784706
IGFBP7	-0.0610941	0.590339	0.181562	0.289251
TEK	-0.0594159	0.600605	0.276206	0.102964
BDNF	-0.192133	0.0877499	-0.0707216	0.681903
IGF1R	0.0276962	0.807331	-0.0117794	0.945639
SNAP25	-0.0459521	0.685659	-0.293312	0.0825317

## Sheet: S7. hormones
Table S7. Associations of sex steroid hormones with 16 menopause-related proteins, from age-adjusted models simultaneously testing effects of estradiol, FSH, and progesterone (UCSB HAS).
protein	Log_estradiol_beta	Log_estradiol_pval	Log_FSH_beta	Log_FSH_pval	Log_Prog_beta	Log_Prog_pval
CNTN2	0.0673101	0.695256	0.434847	0.0316659	0.0291804	0.836895
CCL13	-0.156989	0.0574527	0.124695	0.189578	-0.00452351	0.9464
IL12p70	0.0200917	0.840889	0.185512	0.112856	-0.0602525	0.466496
CXCL1	-0.0198916	0.843195	0.120665	0.302127	-0.0290801	0.726111
CCL26	-0.202519	0.0184646	0.0199831	0.837689	0.0190056	0.784503
CCL2	-0.17906	0.00302368	0.0613892	0.365904	0.041842	0.386875
CCL11	0.0225242	0.68381	0.23043	0.000576793	0.0470205	0.304503
BACE1	0.0254421	0.541104	0.146606	0.00320965	-0.0172134	0.616189
pTau231	-0.0139937	0.848449	0.0531935	0.531167	0.0163366	0.786937
ACHE	-0.0367999	0.432881	0.121641	0.0276102	0.0777973	0.0472145
CD63	-0.112235	0.04487	0.0346902	0.587366	0.00886842	0.845454
IGFBP7	0.0295176	0.369248	0.120248	0.00222806	-0.00692021	0.798125
TEK	-0.109804	0.00918647	0.0386801	0.417664	0.0611019	0.0749975
BDNF	-0.046939	0.159041	0.0507453	0.188343	0.00820571	0.763854
IGF1R	-0.0189551	0.423666	0.0439513	0.111787	0.027966	0.154731
SNAP25	0.0130326	0.367748	0.0312948	0.0644609	0.00258774	0.827958

## Sheet: S8. meno sx peri post
Table S8. Associations of menopause symptoms with 16 menopause-related proteins in peri- and postmenopausal women (UCSB HAS), from separate models adjusted for age and menopause stage.
outcome	hotflash_beta	hotflash_pval	nightsweats_beta	nightsweats_pval	vaginaldryness_beta	vaginaldryness_pval	irritability_beta	irritability_pval
CNTN2	0.333614	0.227392	-0.0825511	0.76478	-0.691345	0.0181671	-0.333614	0.809982
CCL13	0.200594	0.15514	0.321434	0.0190631	0.150856	0.326638	-0.200594	0.916527
IL12p70	0.00394279	0.983693	0.0187131	0.921987	-0.166177	0.424907	-0.00394279	0.142475
CXCL1	0.0909105	0.670245	0.442997	0.0317995	0.00554619	0.980891	-0.0909105	0.445607
CCL26	0.11155	0.427076	0.369115	0.00582775	0.18975	0.210038	-0.11155	0.144345
CCL2	0.0618468	0.547522	0.286665	0.00321039	-0.00133006	0.990494	-0.0618468	0.868812
CCL11	0.110227	0.307152	0.15569	0.142901	-0.0801262	0.494649	-0.110227	0.17091
BACE1	-0.0278685	0.66043	0.0377192	0.547978	-0.0897123	0.187979	0.0278685	0.72554
pTau231	-0.129714	0.390585	-0.119687	0.424156	-0.313913	0.0510859	0.129714	0.915438
ACHE	0.00737964	0.928291	-0.0526828	0.515653	-0.238245	0.00510028	-0.00737964	0.766471
CD63	0.171069	0.0882502	0.0452544	0.653875	-0.185278	0.088378	-0.171069	0.75213
IGFBP7	-0.0333445	0.591797	0.0567232	0.355613	-0.144551	0.0277589	0.0333445	0.746227
TEK	0.00838993	0.910773	0.0375729	0.611944	-0.0158291	0.845263	-0.00838993	0.367319
BDNF	0.0825822	0.205884	0.0874772	0.175613	-0.0517169	0.467371	-0.0825822	0.1258
IGF1R	0.0566155	0.210738	0.028935	0.521188	-0.0885072	0.0682152	-0.0566155	0.291173
SNAP25	-0.0275164	0.274615	0.0086515	0.730353	-0.0352794	0.194867	0.0275164	0.384729

## Sheet: S9. aging meno sx
Table S9. Associations of menopause symptom history with levels of menopause-related proteins in aging women (WRAP), from separate models adjusted for age, bilateral oophorectomy and hormone therapy.
outcome	estimate_hotflashes	p.value_hotflashes	estimate_probsleep	p.value_probsleep	estimate_symptcount	p.value_symptcount
CNTN2	0.25851	0.258794	0.152287	0.400145	0.0695791	0.266082
CCL13	0.312866	0.0582063	0.122132	0.352795	0.0768816	0.0891757
IL12p70	0.426118	0.029887	0.173208	0.268408	0.146116	0.00599758
CXCL1	0.121416	0.783262	0.104751	0.763666	0.00121795	0.991945
CCL26	-0.0886058	0.625636	0.0823146	0.565718	-0.027288	0.582357
CCL2	0.420301	0.00434731	0.00865557	0.942102	0.0540902	0.187572
CCL11	0.161472	0.155012	0.135152	0.131277	0.0327933	0.291892
BACE1	0.139222	0.0578027	0.160451	0.00502637	0.063014	0.00135096
pTau_231	0.263779	0.195773	0.199601	0.215083	0.0775094	0.163862
ACHE	0.00860712	0.941652	0.0609022	0.511201	-0.0075933	0.813175
CD63	0.124529	0.38652	0.0770629	0.49757	0.023407	0.55189
IGFBP7	0.0969573	0.19707	0.0467615	0.432036	0.0253997	0.216419
TEK	0.121148	0.171162	0.0855642	0.221284	0.0413878	0.0861037
IGF1R	0.092131	0.113786	0.101931	0.0255461	0.0365268	0.0206725
SNAP25	-0.000231761	0.995783	0.0493675	0.151241	0.00624105	0.602176

## Sheet: S10. aging memory
Table S10. Associations of menopause-related proteins with memory outcomes in women in two aging cohorts (WRAP and BrANCH), adjusted for age and education.
protein	estimate_WRAP	p.value_WRAP	estimate_Branch	p.value_Branch
CNTN2	0.0438054	0.804759	0.0528575	0.322405
CCL13	-0.128561	0.574401	-0.0558752	0.278713
IL12p70	0.119652	0.522947	-0.00180316	0.973338
CXCL1	-0.233427	0.00611865	0.0401851	0.455922
CCL26	0.094431	0.651488	-0.0310948	0.542136
CCL2	-0.494351	0.0460569	-0.0203387	0.702198
CCL11	-0.658529	0.0337687	-0.120387	0.0244259
BACE1	-0.341205	0.501277	-0.0607516	0.26271
pTau.231	-0.689957	8.4199e-05	-0.0980025	0.0652277
ACHE	-0.636728	0.0481973	0.0128756	0.815536
CD63	-0.401767	0.138661	0.0547821	0.289371
IGFBP7	-0.170751	0.722329	-0.0536956	0.327884
TEK	-0.0761705	0.85909	-0.0256791	0.66629
BDNF	N/A	N/A	-0.0112846	0.836305
IGF1R	-0.658102	0.297656	0.0114068	0.835727
SNAP25	-2.58929	0.00166248	0.0348455	0.515489

[truncated: 3 more sheets: S11. aging exec function, S12. aging ptauAB42, S13. meno stage UKB]
